# Supplementary material
Source: Springer Nature journal article supplement (https://www.springermedizin.de/resource/supplementary/12891_2012_1430_MOESM1_ESM.pdf/9507804)

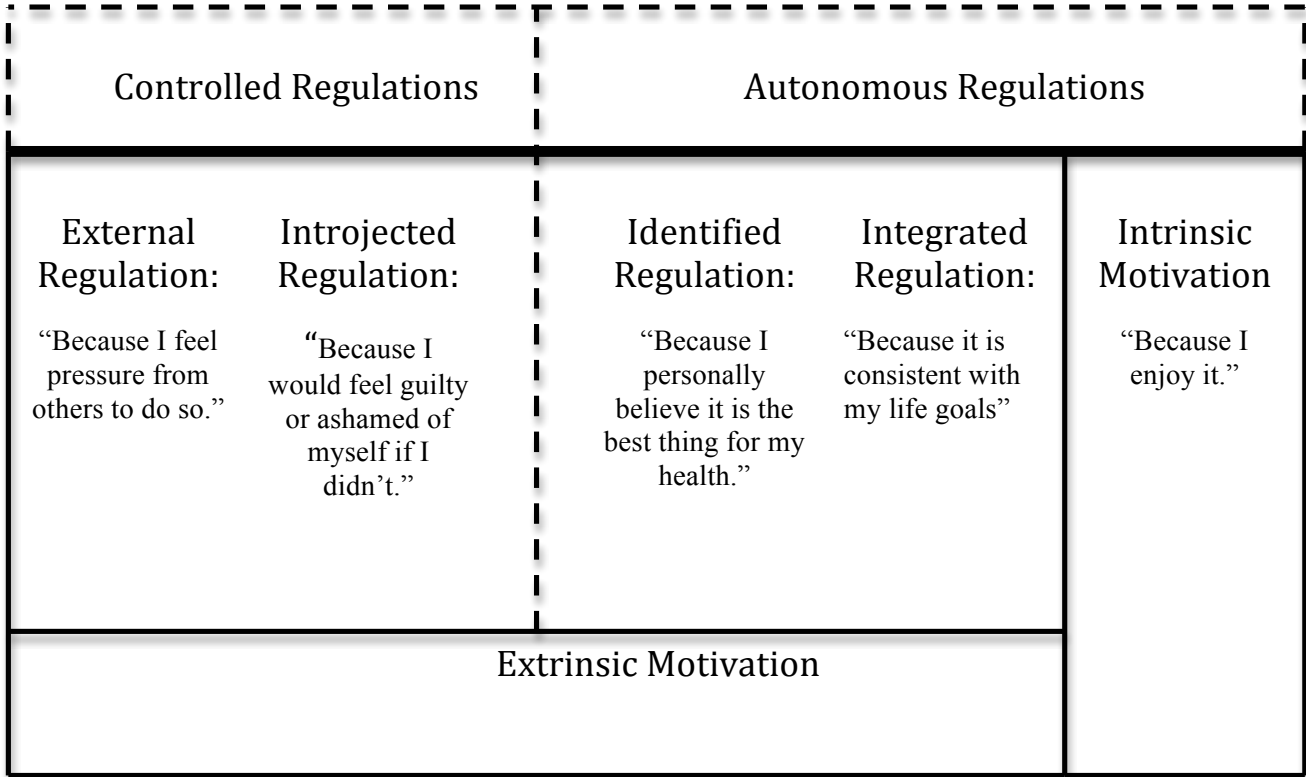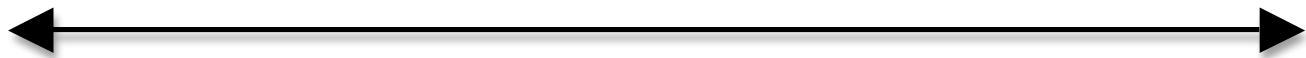

Low self-determination

High self-determination

Supplement: MOESM1 [file 9507804]
